# Supplementary material for: Prediction of the Au4S crystal via a superatom network model: from clusters to solids
Source: Royal Society of Chemistry journal article supplement (doi:10.1039/c9cp06180k), 2020-01-01
Supplement: c9cp06180k1.pdf [file c9cp06180k1.pdf]

Electronic Supplementary Information (ESI)

**Prediction of Au<sub>4</sub>S crystal via superatom network model: from cluster  
to solid**

By

Qiman Liu,<sup>‡a</sup> Chengyu Zhang,<sup>‡a</sup> Chang Xu,<sup>a</sup> Shuanglin Hu<sup>\*b</sup> and Longjiu Cheng<sup>\*a,c</sup>

<sup>a</sup>Department of Chemistry, Anhui University, Hefei, Anhui 230601, P. R. China.

<sup>b</sup>Institute of Nuclear Physics and Chemistry, China Academy of Engineering Physics, Mianyang 621900, Sichuan, China.

<sup>c</sup>Anhui Province Key Laboratory of Chemistry for Inorganic/Organic Hybrid Functionalized Materials, Hefei, Anhui, 230601, P. R. China.

Author Contributions: <sup>‡</sup>These two authors contributed equally to this work.

\*Corresponding authors. E-mail: clj@ustc.edu (L.C), hushuanglin@caep.cn (S.H)

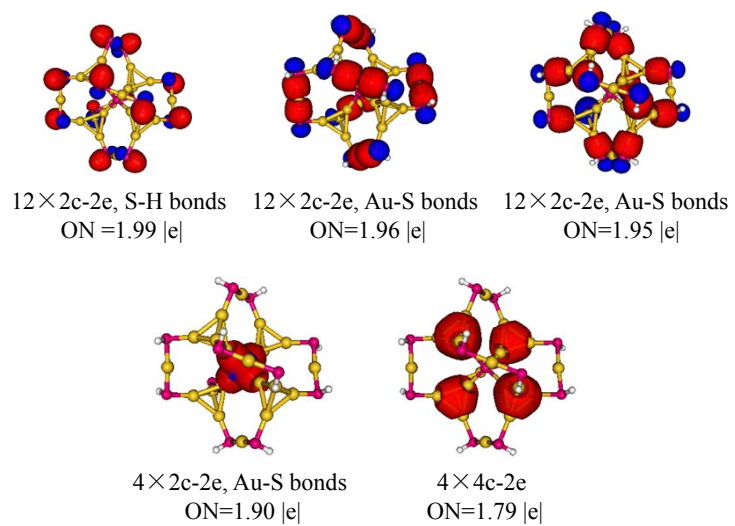

Fig. S1 AdNDP localized natural bonding orbitals of the  $Au_{22}(\mu_4-S)(SH)_{12}$  cluster.

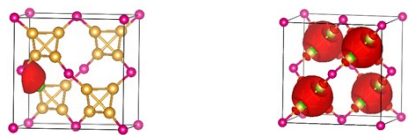

One Au-S  $\sigma$ -bond (ON=1.92 |e|) Four 4c-2e (ON=1.78 |e|)

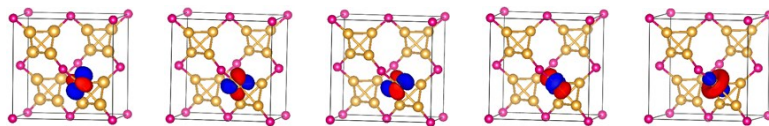

Five d-type lone pairs on one Au atom (ON=1.93-2.00 |e|)

Fig. S2 SSAdNDP chemical bonding pattern of the  $\text{Au}_4\text{S}$ .

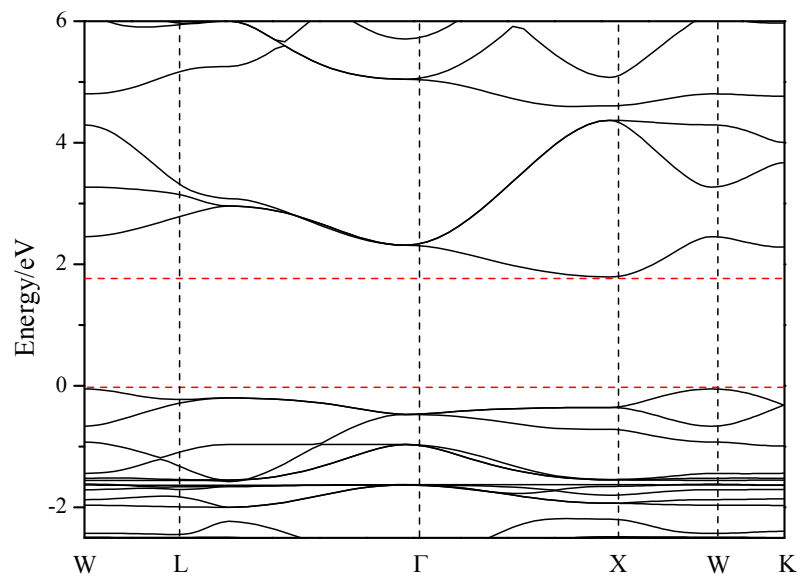

Fig. S3 Electronic band structure of the Au<sub>4</sub>S at the PBE level.

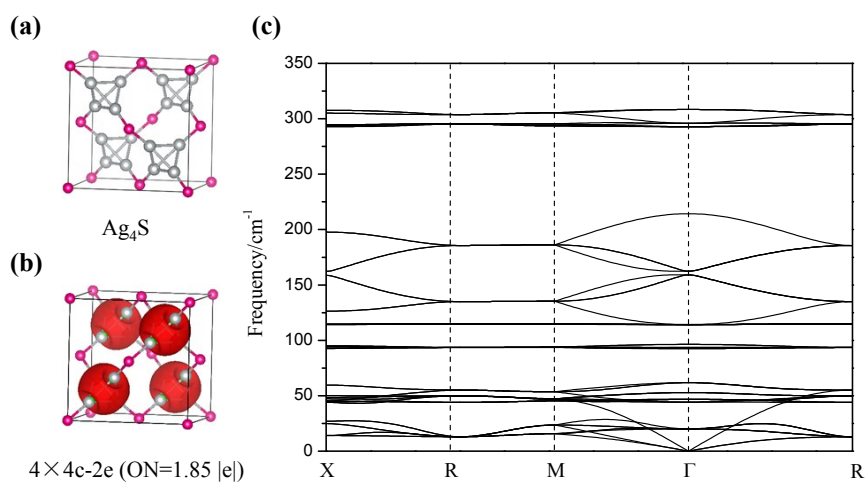

Fig. S4 (a) Optimized structure of the  $\text{Ag}_4\text{S}$  crystal with the unit cell. Gray and red spheres represent Ag and S atoms, respectively. (b) Four  $4c-2e$   $\sigma$  bonding patterns of the  $\text{Ag}_4\text{S}$  using the SSAdNDP method. (c) Calculated phonon dispersion curves along high-symmetry lines in the first Brillouin zone for the  $\text{Ag}_4\text{S}$ .

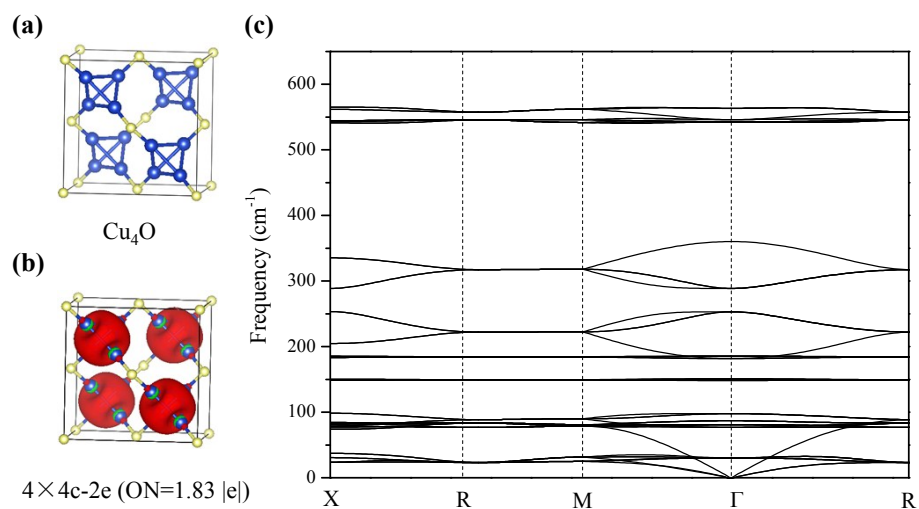

Fig. S5 (a) Optimized structure of the  $\text{Cu}_4\text{O}$  crystal with the unit cell. Green and yellow spheres represent the Cu and O atoms, respectively. (b) Four  $4c-2e$   $\sigma$  bonding patterns of the  $\text{Cu}_4\text{O}$  using the SSAdNDP method. (c) Calculated phonon dispersion curves along high-symmetry lines in the first Brillouin zone for the  $\text{Cu}_4\text{O}$ .
